# Supplementary material for: Design of metastable oxychalcogenide phases by topochemical (de)intercalation of sulfur in La2O2S2
Source: Springer Nature journal article supplement (doi:10.1038/s41467-021-23677-w), 2021-06-14
Supplement: MOESM1 [file 41467_2021_23677_MOESM1_ESM-1.pdf]

## **Supplementary Information**

**Design of Metastable Oxychalcogenide Phases by  
Topochemical (de)intercalation of Sulfur in  $\text{La}_2\text{O}_2\text{S}_2$**

# Experimental procedures

## 1. Characterization methods: Raman spectroscopy

Raman spectra were recorded in a backscattering geometry with a 514 nm argon laser using Renishaw inVia Raman spectrometer. The laser power was adjusted to 0.15 mW on the sample but was limited to 0.015 mW when the Raman signals saturated (the laser power used for each acquisition was noted in Fig. S10 and S14-S15). For all measurements, at least two different points on powder samples are analyzed to ensure homogeneity of samples.

## 2. Characterization methods: Diffuse-reflectance spectroscopy

The diffuse-reflectance spectra were recorded on a Varian Cary 5G spectrometer equipped with a 60 mm diameter integrating sphere and computer control using the Cary WinUV software. Diffuse reflectivity was collected from 250 to 800 nm (i.e. 1.55 – 4.96 eV) as Kubelka-Munk function  $K / S = (1 - R)^2 / (2R)$ , where sample reflectance  $R$  was calibrated using Halon powder (Varian) as the reference of 100% reflectivity.<sup>1</sup> The obtained Kubelka-Munk function  $K / S$  was directly employed for estimation of optical band gap  $E_g$  without converting them into the Tauc plots.<sup>2-3</sup>

## 3. Computational methodology

### *Density functional theory (DFT) calculation for structure optimization*

First-principles calculations are performed using the projected-augmented-wave (PAW) method as implemented in VASP (version 5.4.4). In USPEX calculation, exchange-correlation energy is treated using Perdew-Burke-Ernzerhof (PBE) within the generalized gradient approximation (GGA PAW potentials for lanthane, oxygen and sulfide atoms have a radius of 2.8 au for La ([Kr] core), 1.52 for O ([He] core) and 1.9 au for S ([Ne] core), respectively. To optimize each crystalline structure, 5 successive steps of increasing convergence accuracy are usually required (i.e. 5 INCAR files). The parameters and criteria associated with VASP calculations then correspond to the last (5th) step of the highest accuracy. A kinetic cutoff energy of 550 eV is used for the wavefunction expansion with a Monkhorst-Pack  $k$ -mesh grid with 5 subdivisions along the

reciprocal lattice vectors. All structures are optimized until the net forces on atoms are below 1 meV/Å, and all forces on atoms are converged to less than 0.005 eV/Å.

The series of structures predicted by USPEX algorithm fell into three structure types after the relaxation at the PBE level of theory but one of these three structure with monoclinic  $P2_1/m$  space group was found to be dynamically unstable with negative phonon frequency (*vide infra* for calculation procedure). Therefore, this monoclinic structure was excluded from further considerations. Other two dynamically stable structures were subject to further optimization with the strongly constrained and appropriately normed (SCAN) meta-GGA functional<sup>4</sup> combined with the revised Vydrov–van Voorhis nonlocal correlation (rVV10).<sup>5-6</sup> SCAN+rVV10 functional allows to treat the weak dispersion forces of layered structures and therefore it is suitable to estimate the interlayer spacing as well as intra-layer lattice parameters of  $\text{La}_2\text{O}_2\text{S}$  whose predicted structures are lamellar. The optimization at SCAN+rVV10 level of theory increased the difference in the relative enthalpy between each structure type (Table S2). On the other hand, their structural parameters were hardly varied by the inclusion of van der Waals effects. Thus, the structures given at the PBE level of theory were used for other calculations (*vide infra*) and the comparison with our experimental data.

For better estimation of the optical band gap ( $E_g$ ) of  $\text{La}_2\text{O}_2\text{S}$  phases, the single-point energy calculation using the optimized structure was performed at the Heyd–Scuseria–Ernzerhof (HSE06) hybrid functional level of theory.

### *Phonon calculations*

In this work, first principles phonon calculations using the Density functional perturbation theory (DFPT) at a quasi-harmonic level are done using the open source package PHONOPY.<sup>7</sup> Supercell structures with or without displacements are created from a reference  $\text{La}_2\text{O}_2\text{S}$  unit cell considering all possible crystal symmetry operations. To avoid unphysical imaginary frequencies, a 2x2x2 or a 3x3x2 supercell are used. Force constants are calculated using the optimized structure (VASP). The Brillouin zone and the associated k-path of each structure are computed using the Bilbao crystallographic server tools.<sup>8</sup>

### *Ab Initio molecular dynamics (AIMD)*

*Ab initio* molecular dynamics (AIMD) with canonical ensemble using the Nosé heat bath scheme were performed to evaluate the thermal stability of specific phases up to 1500 K for 10 ps, for a timestep of 1 fs. The simulations based on DFT are also carried out using VASP code to examine the candidate phases (PBE level of theory). In such AIMD simulations, the Brillouin zone

integration is restricted to the  $\Gamma$  point of the supercell, due to a high calculation cost. A 2x2x2 supercell is used (up to **160** atoms per repeat unit). A metastable crystalline structure is definitively termed viable if no structural transformations are observed in the La-S-O network, i.e., an absence of La-O, and La-S bond breaking after a long simulation (10 ps), indicating the existence of a substantial kinetic barrier that facilitates formation and trapping of viable (meta)stable structures.

# Computational results

## 1. Crystal and energy parameters of investigated stable and metastable structures

**Table S1.** Structural parameters and space groups of the two structure types predicted for the fixed composition  $\text{La}_2\text{O}_2\text{S}$  (distances in Å, angle in °).

| Phase name | Z | Space Group           | Lattice parameters                                                             | Atomic coordinates (fractional)                                                                                                               | Volumes ( $\text{Å}^3/\text{atom}$ ) |
|------------|---|-----------------------|--------------------------------------------------------------------------------|-----------------------------------------------------------------------------------------------------------------------------------------------|--------------------------------------|
| <i>hp</i>  | 1 | $P\bar{3}m1$<br>(164) | $a = b = 4.120$<br>$c = 6.615$<br>$\alpha = \beta = 90.0$<br>$\gamma = 120.0$  | La1 : (1/3, 2/3, 0.27720)<br>O1 : (1/3, 2/3, -0.36661)<br>S1 : (0, 0, 0)                                                                      | 459                                  |
| <i>oA</i>  | 2 | $Amm2$<br>(38)        | $a = 4.142$<br>$b = 4.012$<br>$c = 12.706$<br>$\alpha = \beta = \gamma = 90.0$ | La1 : (0.0, 0.0, -0.16352)<br>La2 : (0.5, 0.0, -0.47031)<br>O1 : (0.5, 0.0, -0.06718)<br>O2 : (0.0, 0.0, 0.44459)<br>S1 : (0.5, 0.0, 0.21191) | 230                                  |

**Table S2.** Computed relative energy *hp*- and *oA*- $\text{La}_2\text{O}_2\text{S}$  phases at the PBE and SCAN+rVV10 levels of theory.

| Structure                                   | $\Delta E$ in PBE<br>(eV/atom) | $\Delta E$ in SCAN+rVV10<br>(eV/atom) |
|---------------------------------------------|--------------------------------|---------------------------------------|
| <i>hp</i> - $\text{La}_2\text{O}_2\text{S}$ | +0.00                          | +0.00                                 |
| <i>oA</i> - $\text{La}_2\text{O}_2\text{S}$ | +0.072                         | +0.396                                |

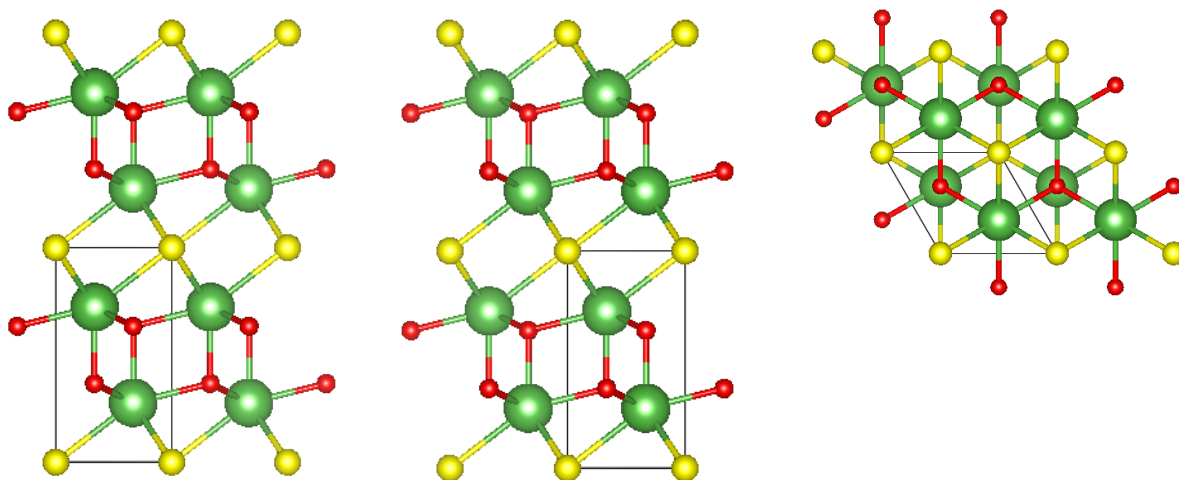

**Figure S1.** The lowest-energy structure  $hP\text{-La}_2\text{O}_2\text{S}$  predicted by the evolutionary algorithm USPEX (See Table S1 for its structural parameters). These images are viewed along (left)  $a$ -axis, (middle)  $b$ -axis, and (right)  $c$ -axis. Lanthanum, oxygen and sulfur atoms are represented by the green, red and yellow spheres respectively. The structure can be classified into the apthitalite type, where the  $(\text{La}_2\text{O}_2)^{2+}$  monolayer possesses hexagonal symmetry and sulfur atoms lie on the same plane without corrugation.

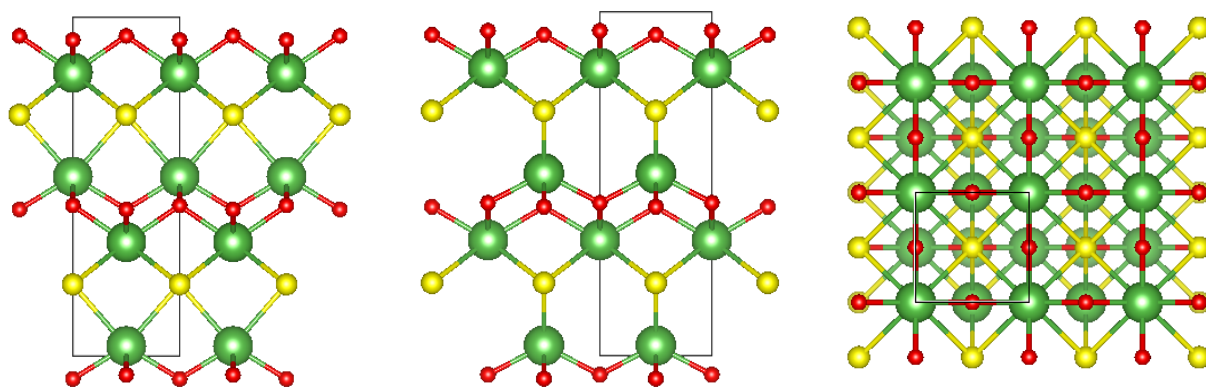

**Figure S2.** The 2<sup>nd</sup> lowest-energy structure of  $oA\text{-La}_2\text{O}_2\text{S}$  predicted by the evolutionary algorithm USPEX (See Table S1 for its structural parameters). These images are viewed along (left)  $a$ -axis, (middle)  $b$ -axis, and (right)  $c$ -axis. Lanthanum, Oxygen and Sulfur atoms are represented by the green, red and yellow spheres respectively. The  $(\text{La}_2\text{O}_2)^{2+}$  monolayer exhibits almost tetragonal in-plane symmetry as observed in the precursor  $\text{La}_2\text{O}_2\text{S}_2$ . Sulfur atoms lie on the same plane without corrugation.

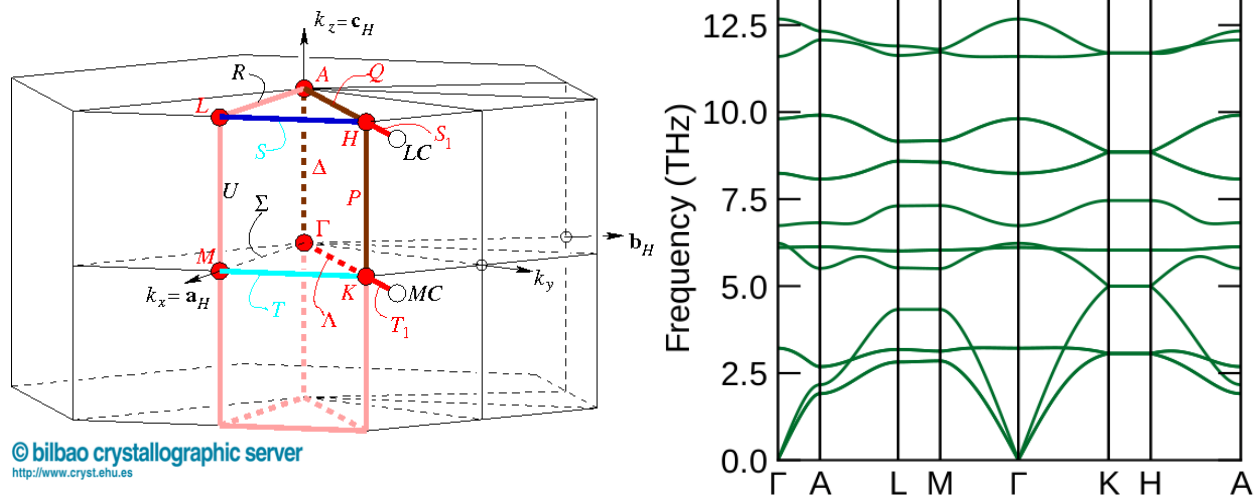

**Figure S3.** Brillouin zone of the predicted structure type  $hP$ - $\text{La}_2\text{O}_2\text{S}$  and its phonon dispersion calculated by using DEPT at the GGA-PBE level of theory (See the experimental procedure for details).

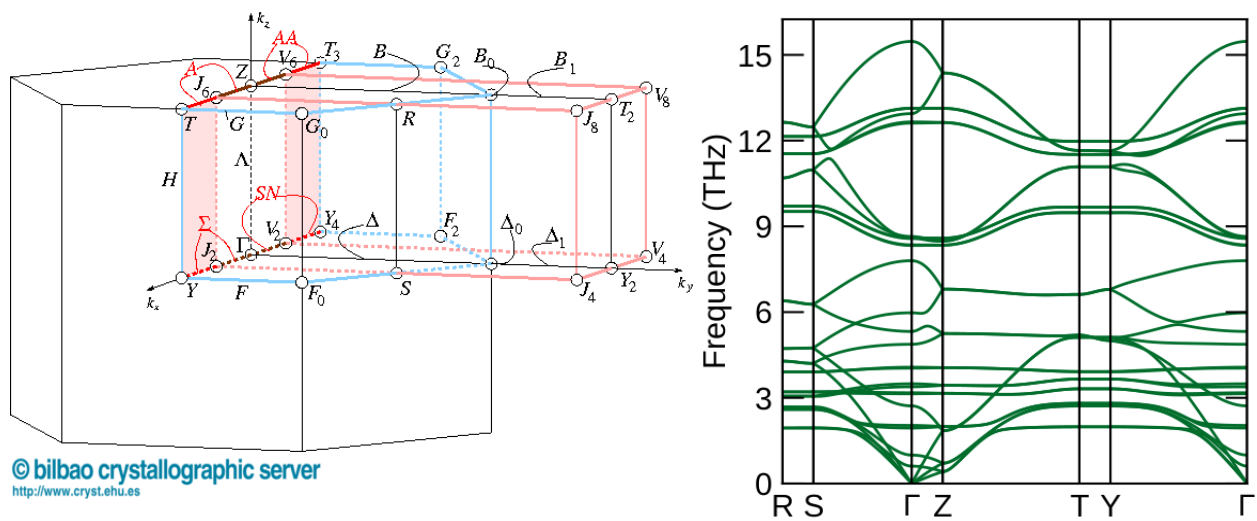

**Figure S4.** Brillouin zone of the predicted structure type  $oA$ - $\text{La}_2\text{O}_2\text{S}$  and its phonon dispersion calculated by using DEPT at the GGA-PBE level of theory (See the experimental procedure for details).

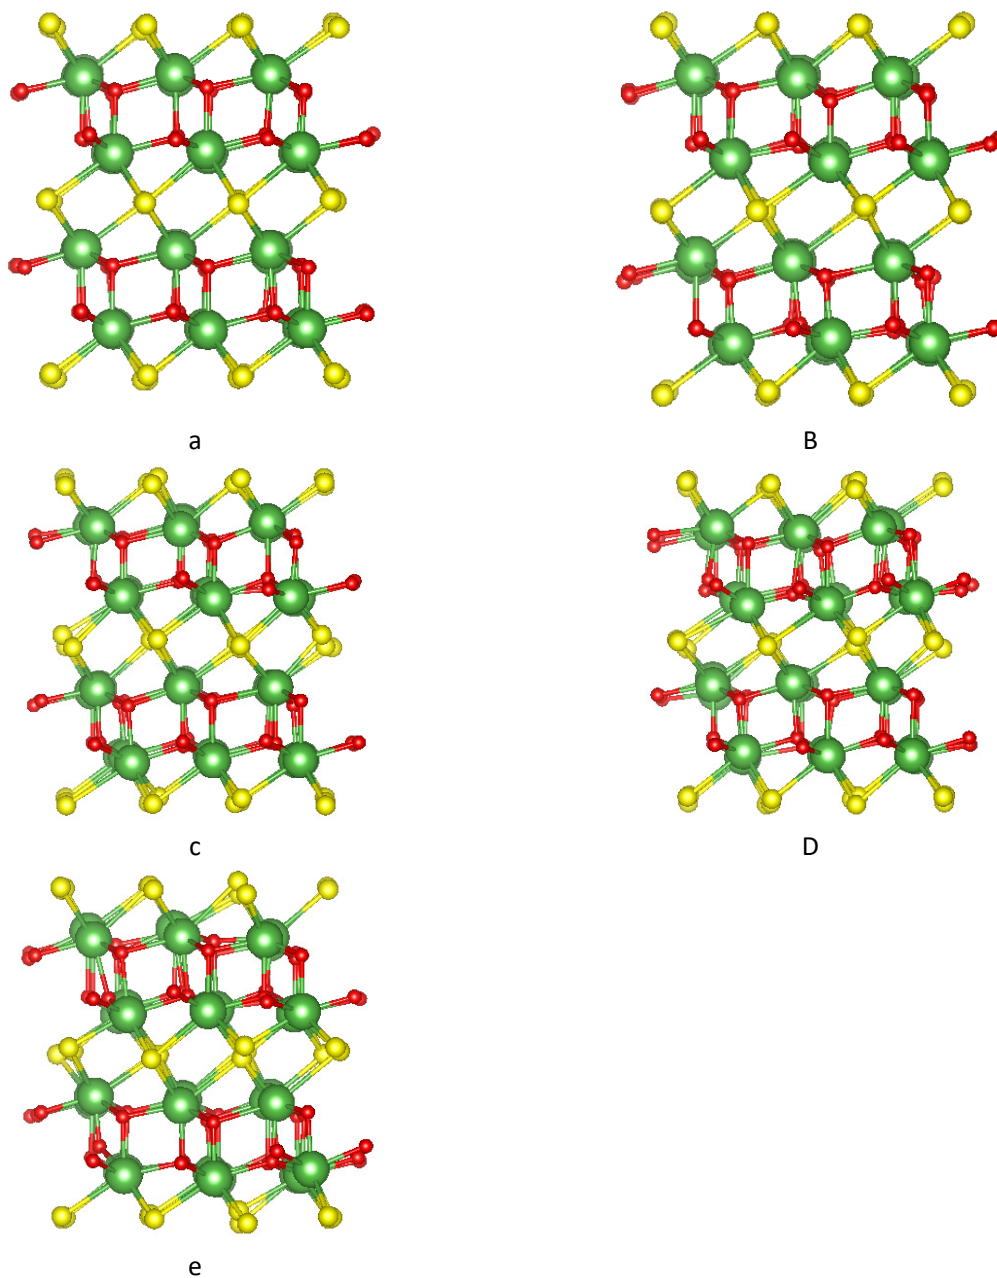

**Figure S5.** Snapshots of the type  $hP$ - $\text{La}_2\text{O}_2\text{S}$   $3 \times 3 \times 2$  supercell at the end of 10 ps AIMD simulations at (a) 300 K, (b) 600 K, (c) 900 K, (d) 1200K and (e) 1500 K. Lanthanum, Oxygen and Sulfur atoms are represented by the green, red and yellow spheres respectively. As observed on Figure S7, the  $hP$ - $\text{La}_2\text{O}_2\text{S}$  structure is thermally stable up to 1500 K.



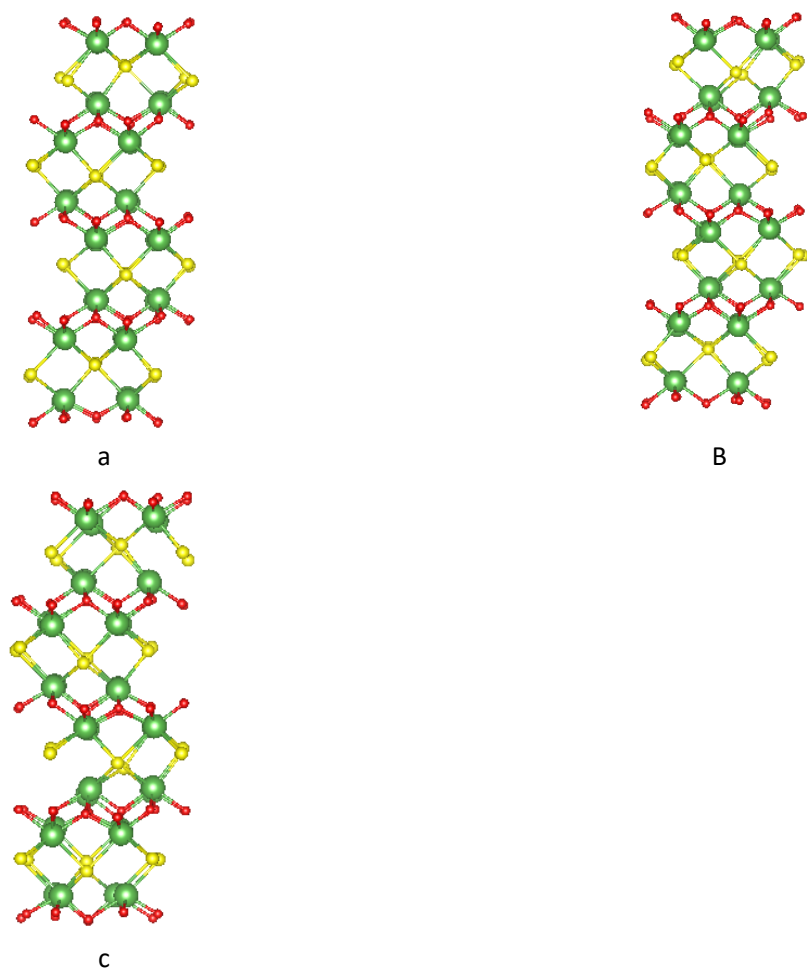

**Figure S6.** Snapshots of the type  $oA\text{-La}_2\text{O}_2\text{S}$   $2 \times 2 \times 2$  supercell at the end of 10 ps AIMD simulations at (a) 300 K, (b) 600 K and (c) 900 K. Lanthanum, oxygen and sulfur atoms are represented by the green, red and yellow spheres respectively. As observed in the figure, the  $oA\text{-La}_2\text{O}_2\text{S}$  structure is thermally stable up to 600 K.

# Experimental results

## 1. Characterization of $\alpha$ -La<sub>2</sub>O<sub>3</sub>S

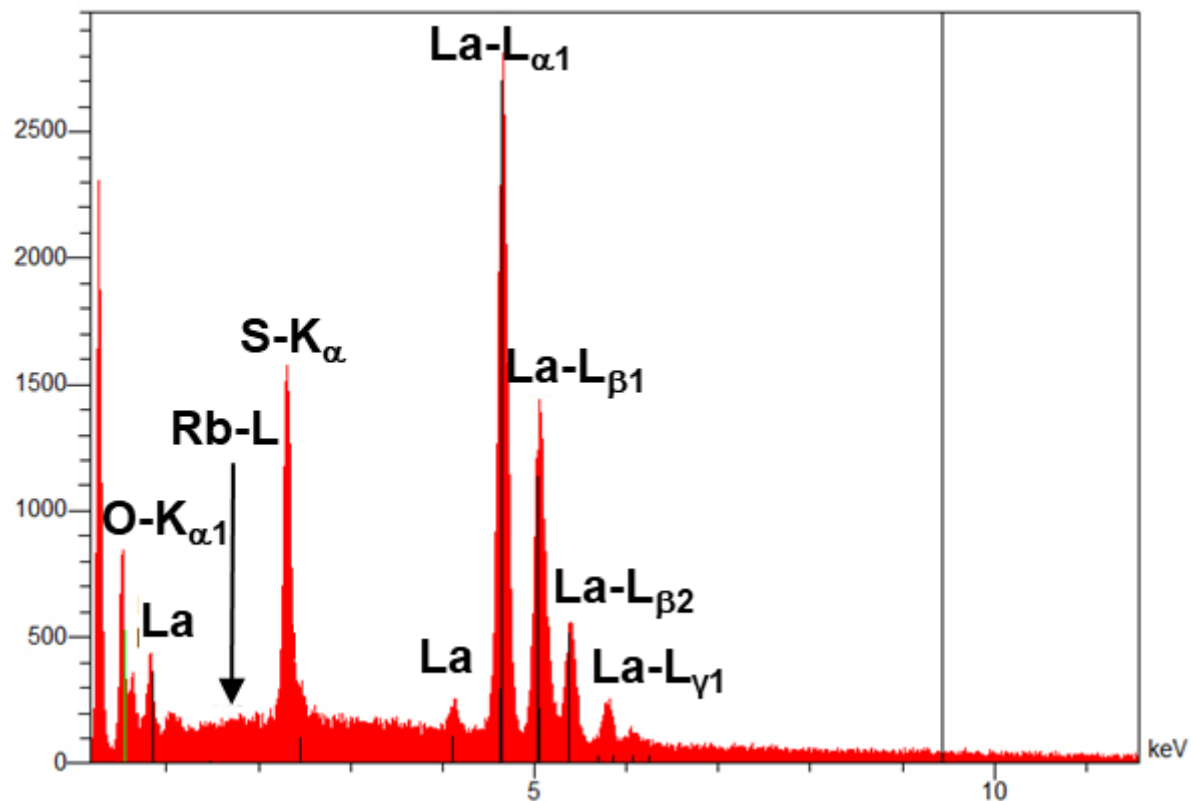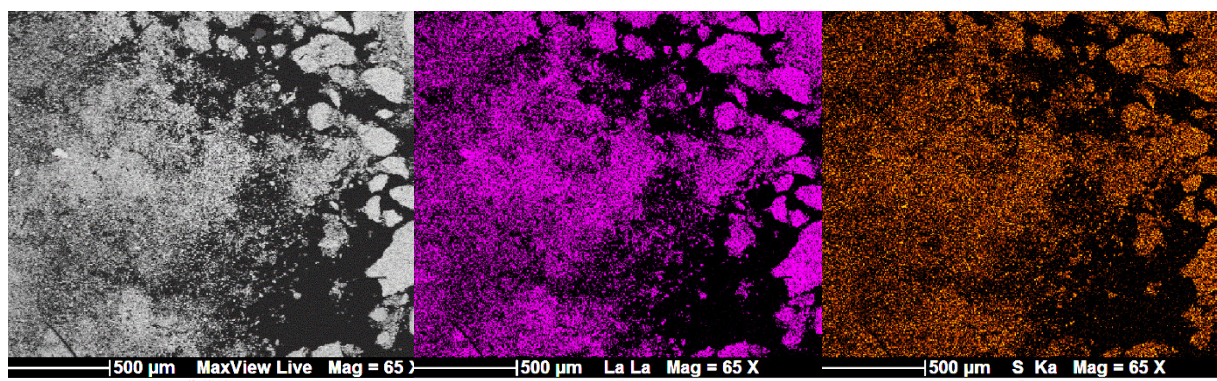

**Figure S7.** (a) EDX spectrum of the  $\alpha$ -La<sub>2</sub>O<sub>3</sub>S powder sample impregnated with the epoxy resin and (b) its backscattered electron image (BEI) as well as its elemental composition mapped for La and S.

**Table S3.** Crystallographic parameters determined from Rietveld refinement of oA-La<sub>2</sub>O<sub>2</sub>S powder.

| <b>Crystallographic data</b>                                         |                                                                                                                                                                                                                          |          |           |                                           |
|----------------------------------------------------------------------|--------------------------------------------------------------------------------------------------------------------------------------------------------------------------------------------------------------------------|----------|-----------|-------------------------------------------|
| Chemical formula                                                     | La <sub>2</sub> O <sub>2</sub> S                                                                                                                                                                                         |          |           |                                           |
| Molar mass (g mol <sup>-1</sup> )                                    | 341.87                                                                                                                                                                                                                   |          |           |                                           |
| Symmetry                                                             | Orthorhombic                                                                                                                                                                                                             |          |           |                                           |
| Color                                                                | White                                                                                                                                                                                                                    |          |           |                                           |
| Space group                                                          | <i>Amm</i> 2 (No. 38)                                                                                                                                                                                                    |          |           |                                           |
| <i>a</i> (Å)                                                         | 4.1489(0)                                                                                                                                                                                                                |          |           |                                           |
| <i>b</i> (Å)                                                         | 3.9750(9)                                                                                                                                                                                                                |          |           |                                           |
| <i>c</i> (Å)                                                         | 12.727(9)                                                                                                                                                                                                                |          |           |                                           |
| Volume (Å <sup>3</sup> )                                             | 209.9(1)                                                                                                                                                                                                                 |          |           |                                           |
| <i>Z</i>                                                             | 2                                                                                                                                                                                                                        |          |           |                                           |
| Density (g cm <sup>-3</sup> )                                        | 5.4088                                                                                                                                                                                                                   |          |           |                                           |
| Anisotropic strain (Å <sup>-2</sup> ) <sup>2</sup>                   | <i>S</i> <sub>400</sub> = 11.7(9); <i>S</i> <sub>040</sub> = 8.60(1); <i>S</i> <sub>004</sub> = 0.0481(0);<br><i>S</i> <sub>220</sub> = 2.81(9); <i>S</i> <sub>202</sub> = 0.829(4); <i>S</i> <sub>022</sub> = 0.634(3); |          |           |                                           |
| March-Dollase parameter<br>(Preferred orientation along <100>)       | <i>P</i> <sub>md</sub> = 0.943(1)                                                                                                                                                                                        |          |           |                                           |
| <b>Structural refinement</b>                                         |                                                                                                                                                                                                                          |          |           |                                           |
| Profile reliability factor                                           | <i>R</i> <sub>p</sub> = 6.39%                                                                                                                                                                                            |          |           |                                           |
| Weighted profile reliability factor                                  | <i>R</i> <sub>wp</sub> = 8.74%                                                                                                                                                                                           |          |           |                                           |
| Bragg reliability factors                                            | <i>R</i> (obs) = <i>R</i> (all) = 1.68%                                                                                                                                                                                  |          |           |                                           |
| Weighted Bragg profile reliability factors                           | <i>R</i> <sub>w</sub> (obs) = <i>R</i> <sub>w</sub> (all) = 2.29%                                                                                                                                                        |          |           |                                           |
| Goodness of fit                                                      | $\chi^2 = 1.33$                                                                                                                                                                                                          |          |           |                                           |
| <b>Atomic positions and isotropic thermal parameters<sup>a</sup></b> |                                                                                                                                                                                                                          |          |           |                                           |
| Atom                                                                 | <i>x</i>                                                                                                                                                                                                                 | <i>y</i> | <i>z</i>  | <i>U</i> <sub>iso</sub> (Å <sup>2</sup> ) |
| La1                                                                  | 0                                                                                                                                                                                                                        | 0        | 0.6441(9) | 0.0055(4)                                 |
| La2                                                                  | 0.5                                                                                                                                                                                                                      | 0.5      | 0.8379(7) | 0.0040(2)                                 |
| O1                                                                   | 0                                                                                                                                                                                                                        | 0.5      | 0.7360(4) | 0.005 <sup>b</sup>                        |
| O2                                                                   | 0.5                                                                                                                                                                                                                      | 0        | 0.7180(0) | 0.005 <sup>b</sup>                        |
| S1                                                                   | 0                                                                                                                                                                                                                        | 0        | 0.9665(4) | 0.0066(1)                                 |

<sup>a</sup> Site-occupancy factors of all atoms are fixed to full occupancy.<sup>b</sup> These atomic displacement factors are fixed to 0.005.

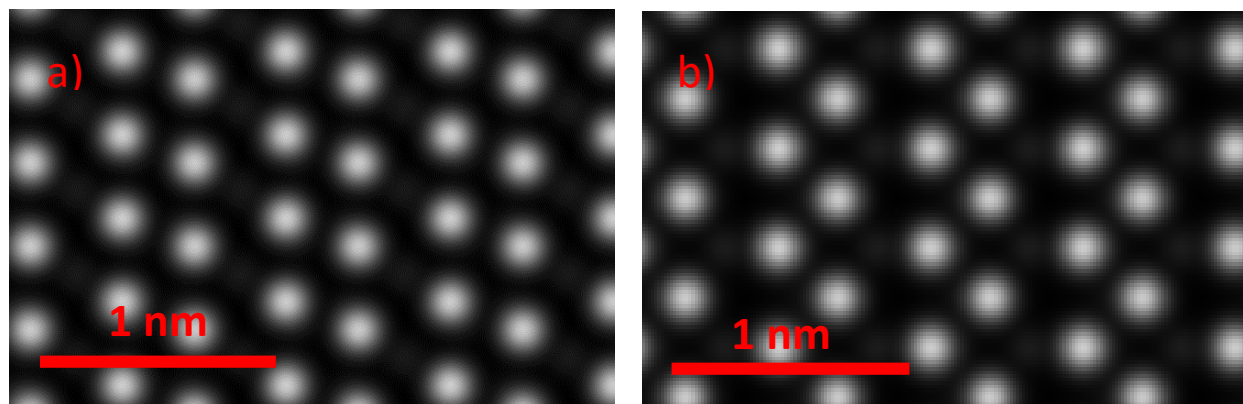

**Figure S8.** Comparison of simulated HAADF images with the stable phase  $hP$ - $\text{La}_2\text{O}_2\text{S}$  (a) and the new  $oA$ - $\text{La}_2\text{O}_2\text{S}$  (b) along [001]

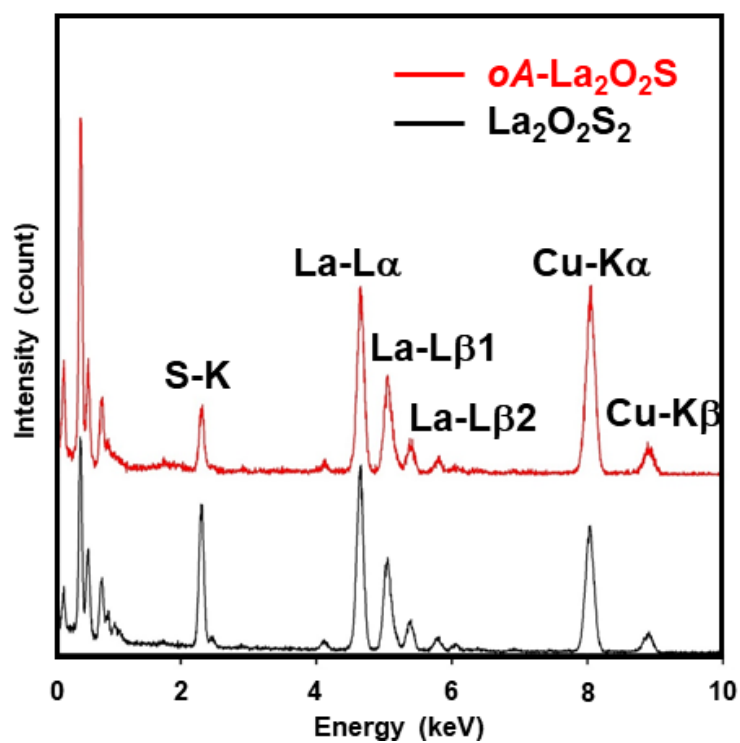

**Figure S9.** Energy-dispersive X-ray (EDX) spectra of  $oA$ - $\text{La}_2\text{O}_2\text{S}$  (red) and  $\text{La}_2\text{O}_2\text{S}_2$  (black). The measurements were carried out on their single crystals ( $\leq 100$  nm) by STEM.

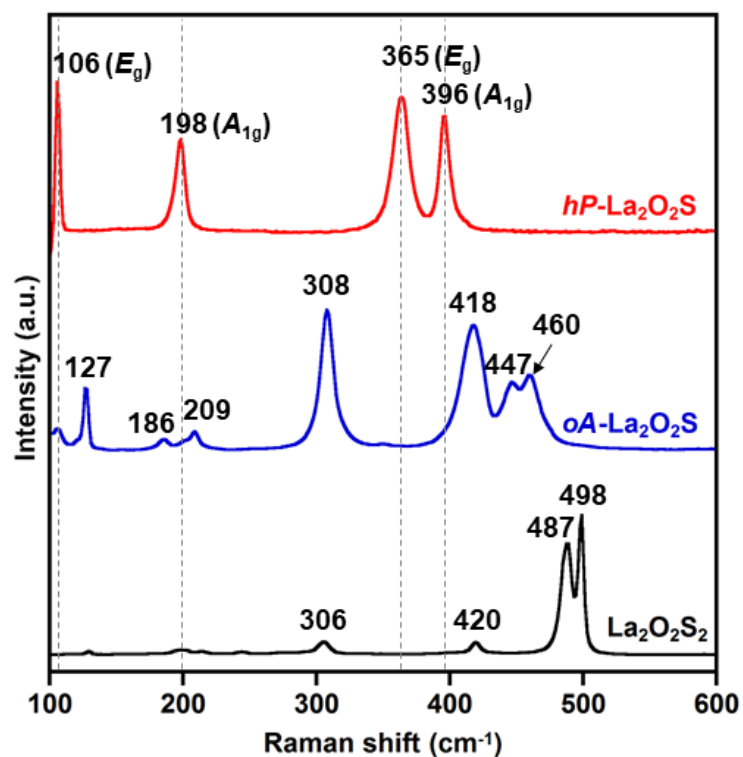

**Figure S10.** Raman spectra of La<sub>2</sub>O<sub>2</sub>S<sub>2</sub>, oA-La<sub>2</sub>O<sub>2</sub>S and hP-La<sub>2</sub>O<sub>2</sub>S. oA-La<sub>2</sub>O<sub>2</sub>S was prepared by the topochemical reaction of La<sub>2</sub>O<sub>2</sub>S<sub>2</sub> with Rb (*vide supra*). hP-La<sub>2</sub>O<sub>2</sub>S was obtained from the thermal treatment of La<sub>2</sub>O<sub>2</sub>S<sub>2</sub> under 5% H<sub>2</sub> / Ar at 500 °C (See Figure S12). Raman spectrum of hP-La<sub>2</sub>O<sub>2</sub>S was found identical with that reported by Yokono *et al.*<sup>9</sup> and thus assigned in accordance with their factor group analysis. Laser power: 0.15 mW.

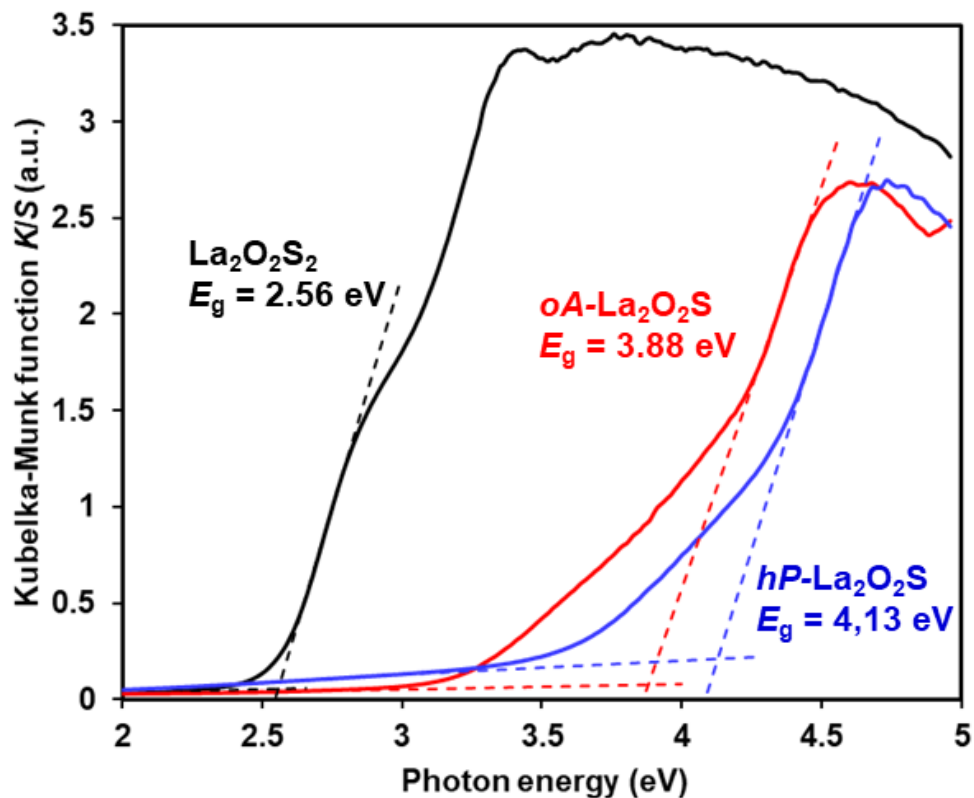

**Figure S11.** Diffuse-reflectance spectra of  $\text{La}_2\text{O}_2\text{S}_2$ , *oA*- and *hP*- $\text{La}_2\text{O}_2\text{S}$  and their bandgap  $E_g$ . The difference in  $E_g$  values between *oA*- $\text{La}_2\text{O}_2\text{S}$  and *hP*- $\text{La}_2\text{O}_2\text{S}$  is related to the change of conformation of the  $\text{La}_2\text{O}_2$  layer inducing a change of the coordination sphere of the sulfur atoms (trigonal antiprism in *hP* vs trigonal prism in *oA*). The decrease of the gap going from *oA*- $\text{La}_2\text{O}_2\text{S}$  to  $\text{La}_2\text{O}_2\text{S}_2$  is directly related to the formation of the S-S pairs in the latter compound. It leads to a change of character of the conduction band from the La(5d) band to the lower lying 3p  $\sigma^*$  level of the S-S bond.

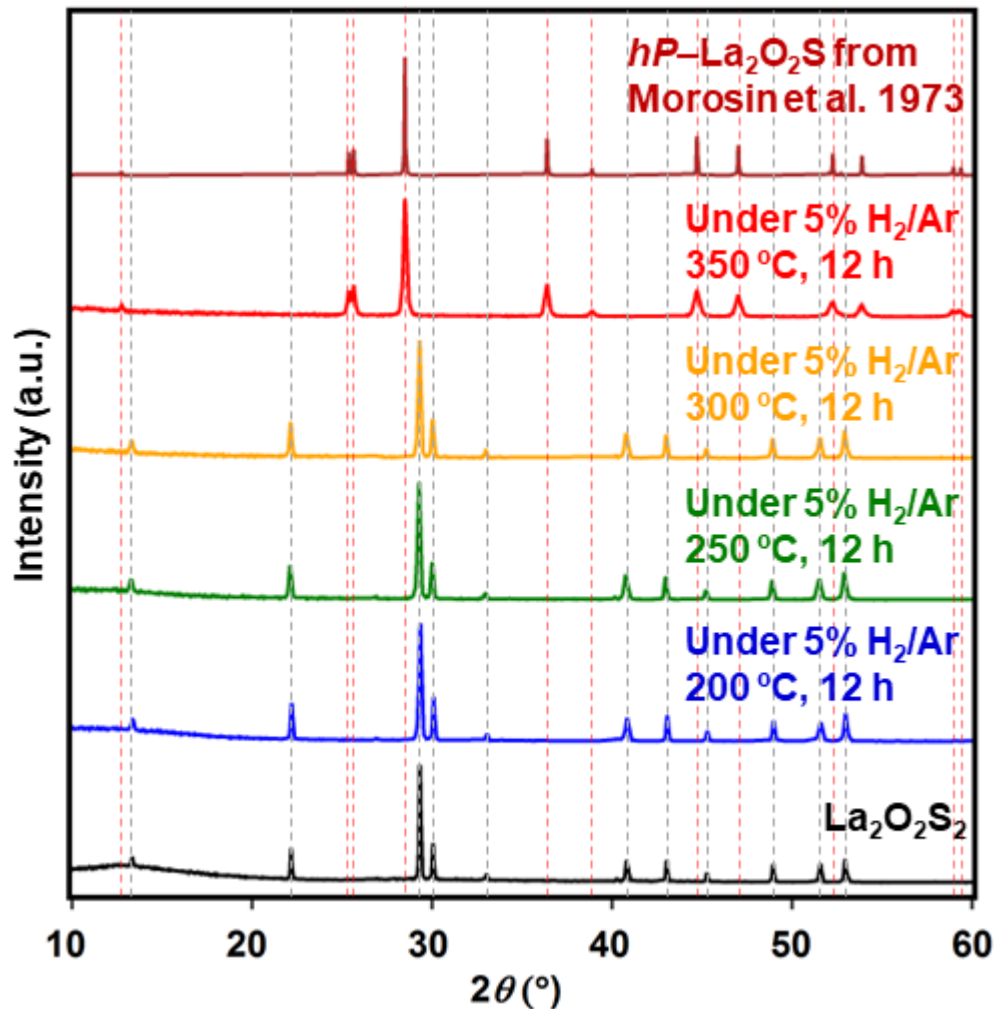

**Figure S12.** XRD patterns after the thermal treatment of  $\text{La}_2\text{O}_2\text{S}_2$  under 5%  $\text{H}_2 / \text{Ar}$  flow at 200-350 °C. For comparison also the theoretical XRD pattern of  $hP\text{-La}_2\text{O}_2\text{S}$  reproduced from the literature<sup>10</sup> was displayed.

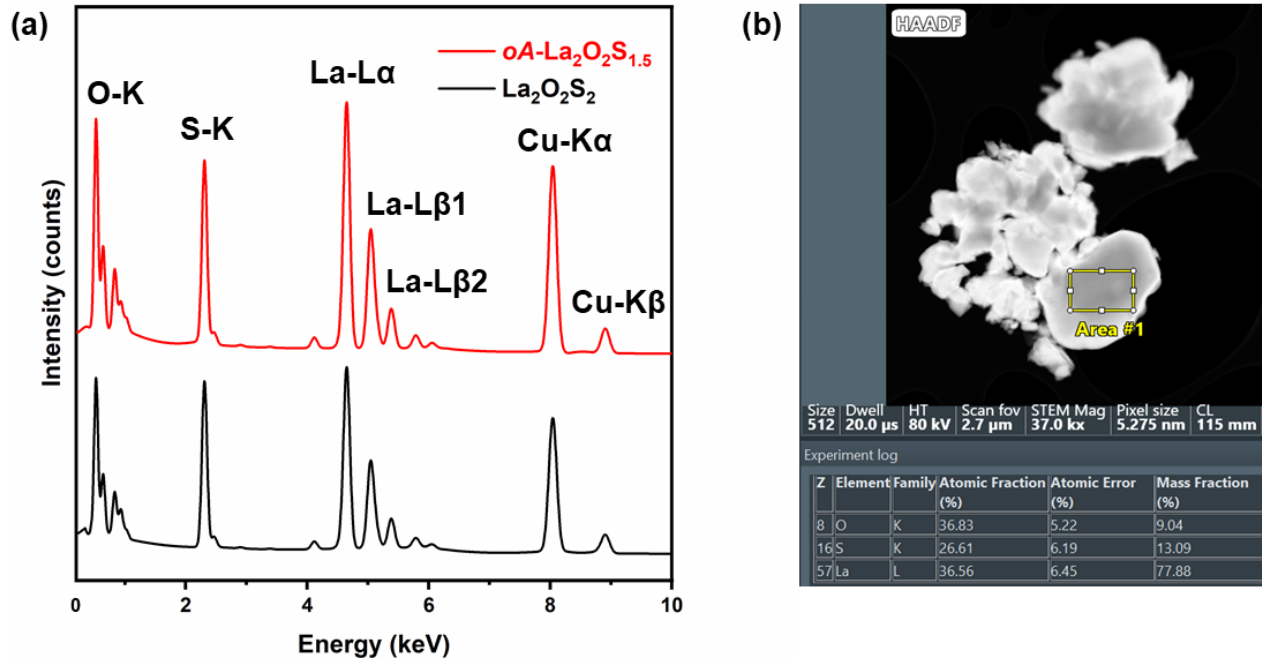



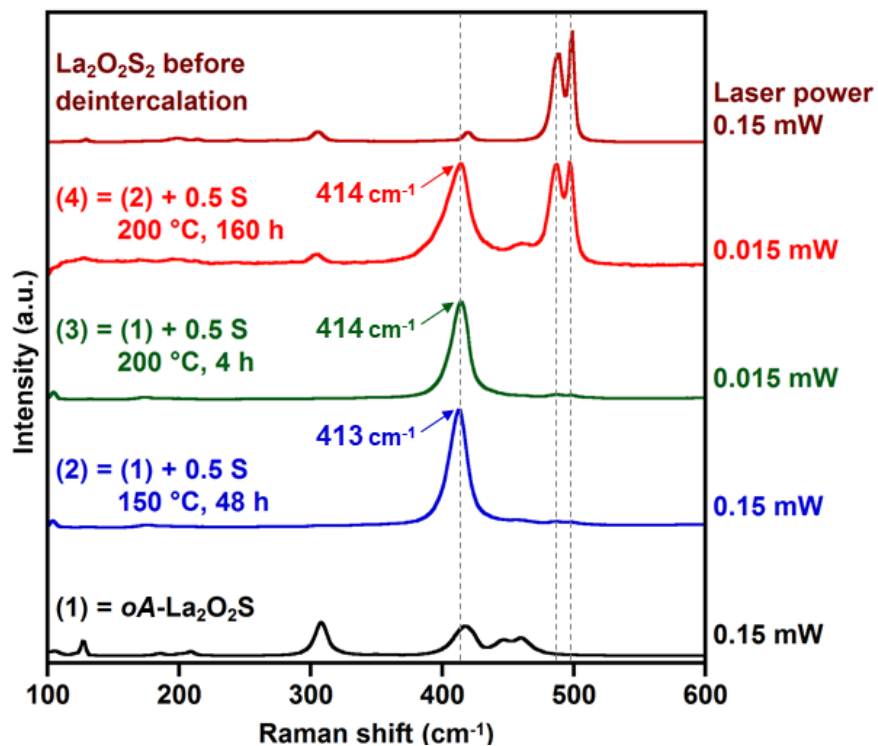

**Figure S14.** Raman spectra of oA- $\text{La}_2\text{O}_2\text{S}$  and its mixture with sulfur after thermal treatments under 150–200 °C. For comparison, also the Raman spectrum of the pristine  $\text{La}_2\text{O}_2\text{S}_2$  is displayed.

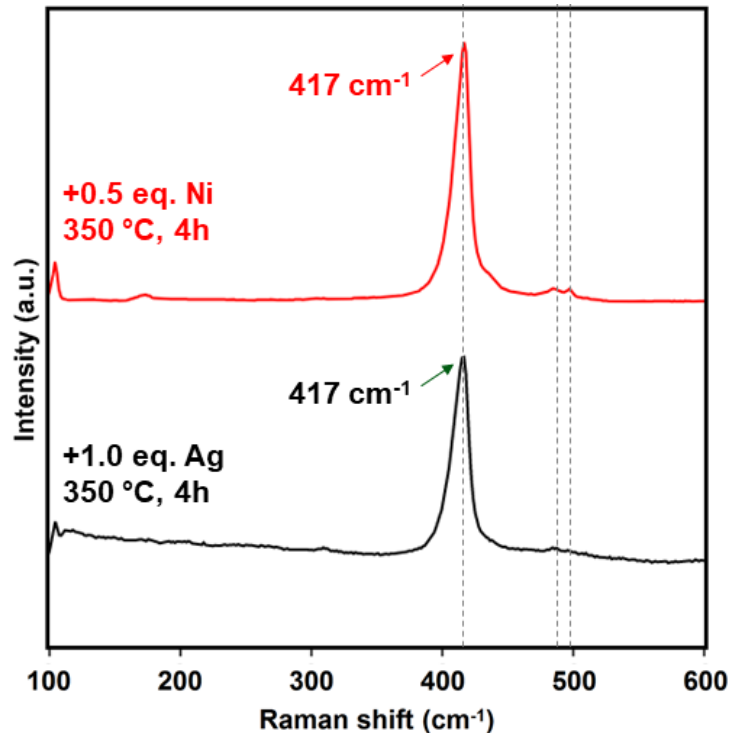

**Figure S15.** Raman spectra of  $\text{La}_2\text{O}_2\text{S}_2$  and its mixture with Ag and Ni after the thermal treatments at 350 °C.

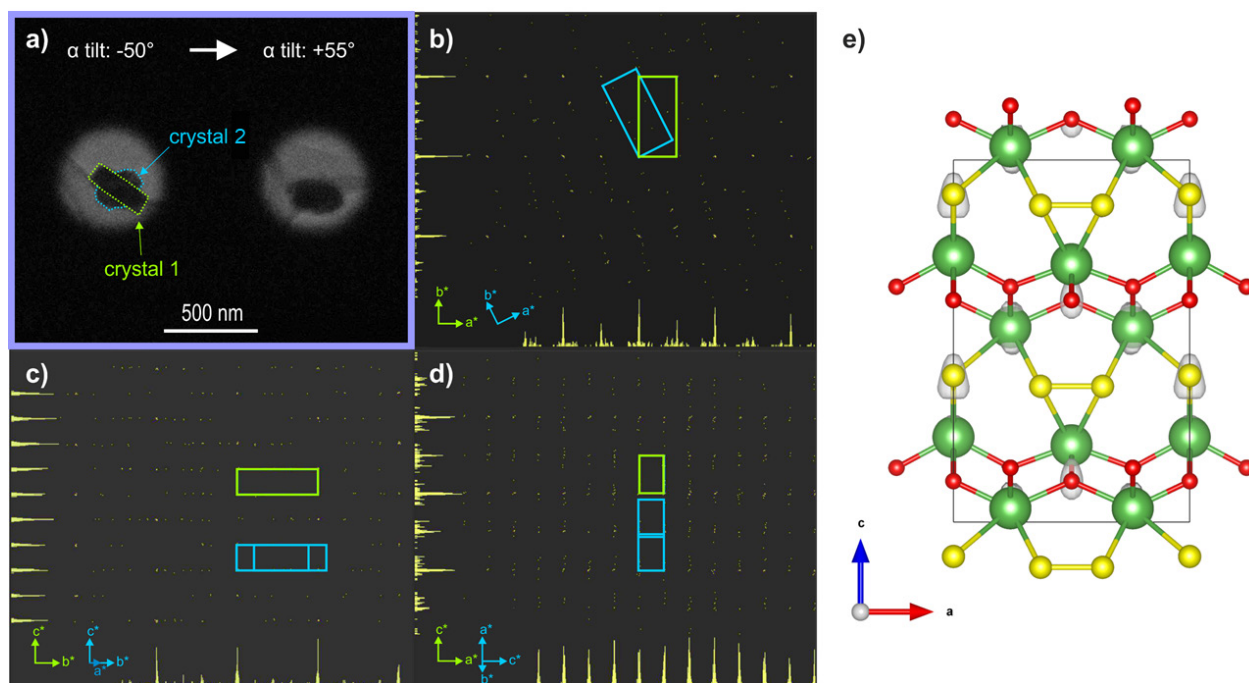

**Figure S16.** a) Picture of the two superimposed crystals used in the structure analysis of  $\text{La}_2\text{O}_2\text{S}_{1.5}$ . Projections of the reciprocal space reconstructed in PETS2.0 following b)  $c^*$  (crystal 1), c)  $a^*$  and d)  $b^*$  showing the unit cells of the two crystals measured in the same PEDT data set. The green and blue indexing correspond to the crystal 1 and 2 respectively. e) Structure solved in SUPERFLIP and superimposed with electrostatic potential map represented as isosurfaces.

**Table S4.** Summary of PEDT data and its refinement.

|                                                          |                                                                          |            |     |            |                                    |
|----------------------------------------------------------|--------------------------------------------------------------------------|------------|-----|------------|------------------------------------|
| <b>Unit-cell parameters (PEDT)</b>                       |                                                                          |            |     |            |                                    |
| Refined structural formula                               | La <sub>2</sub> O <sub>2</sub> S <sub>1.5</sub>                          |            |     |            |                                    |
| A                                                        | 8.348 Å                                                                  |            |     |            |                                    |
| B                                                        | 3.961 Å                                                                  |            |     |            |                                    |
| C                                                        | 12.645 Å                                                                 |            |     |            |                                    |
| V                                                        | 418.1 Å <sup>3</sup>                                                     |            |     |            |                                    |
| Z                                                        | 4                                                                        |            |     |            |                                    |
| Density [g.cm <sup>-3</sup> ]                            | 5.6864                                                                   |            |     |            |                                    |
| Space group                                              | <i>Amm</i> 2                                                             |            |     |            |                                    |
| <b>Data Acquisition</b>                                  |                                                                          |            |     |            |                                    |
| Temperature                                              | ambient                                                                  |            |     |            |                                    |
| TEM                                                      | Philips CM120                                                            |            |     |            |                                    |
| Radiation (wavelength)                                   | electrons (0.0335Å)                                                      |            |     |            |                                    |
| Resolution range sinθ/λ                                  | 0.1–0.7 Å <sup>-1</sup>                                                  |            |     |            |                                    |
| Limiting Miller indices                                  | 0 < h < 11, 0 < k < 5, -17 < l < 17                                      |            |     |            |                                    |
| No. of independent reflections (obs/all) – kinematic     | 696/2905                                                                 |            |     |            |                                    |
| R <sub>int</sub> (obs/all) – kinematic                   | cryst.1: 16.33%/16.47%, cryst. 2: 20.30%/21.77%                          |            |     |            |                                    |
| Redundancy                                               | 4.115                                                                    |            |     |            |                                    |
| Coverage for sinθ/λ = 0.7Å <sup>-1</sup>                 | 97.88 %                                                                  |            |     |            |                                    |
| <b>Kinematical refinement</b>                            |                                                                          |            |     |            |                                    |
| No. of reflections (obs/all)                             | 1803/7132                                                                |            |     |            |                                    |
| R, wR (obs)                                              | 0.2360/0.3009                                                            |            |     |            |                                    |
| N parameters                                             | 11                                                                       |            |     |            |                                    |
| <b>Dynamical refinement</b>                              |                                                                          |            |     |            |                                    |
| RSg(max) (cryst. 1, cryst. 2)                            | 0.55                                                                     |            |     |            |                                    |
| No. of reflections (obs/all)                             | all: 3523/4246<br>cryst.1.: 1836/2130<br>cryst.2.: 1687/2116             |            |     |            |                                    |
| R, wR (obs)                                              | all: 0.1012/0.1142<br>cryst.1.: 0.0941/0.1027<br>cryst.2.: 0.1105/0.1301 |            |     |            |                                    |
| N parameters/N struct. parameters                        | 200/13                                                                   |            |     |            |                                    |
| Crystal thickness (cryst. 1, cryst. 2)                   | 428(2) Å and 354(3) Å                                                    |            |     |            |                                    |
| <b>Atomic positions and isotropic thermal parameters</b> |                                                                          |            |     |            |                                    |
| Atom                                                     | wyck.                                                                    | x/a        | y/b | z/c        | U <sub>iso</sub> [Å <sup>2</sup> ] |
| La1                                                      | 4c                                                                       | 0.2647(2)  | 0.5 | 0.1144(6)  | 0.0099(3)                          |
| La2                                                      | 2b                                                                       | 0.5        | 0.5 | 0.4182(7)  | 0.0099(3)                          |
| La3                                                      | 2a                                                                       | 0          | 0.5 | 0.4387(7)  | 0.0099(3)                          |
| O1                                                       | 2a                                                                       | 0          | 0.5 | 0.0440(12) | 0.0017(8)                          |
| O2                                                       | 2b                                                                       | 0.5        | 0.5 | 0.0103(11) | 0.0017(8)                          |
| S1                                                       | 4c                                                                       | 0.1204(7)  | 0   | 0.2768(8)  | 0.0114(9)                          |
| S2                                                       | 2b                                                                       | 0.5        | 0   | 0.2367     | 0.0114(9)                          |
| O3                                                       | 4c                                                                       | -0.2542(9) | 0.5 | 0.5123(10) | 0.0017(8)                          |

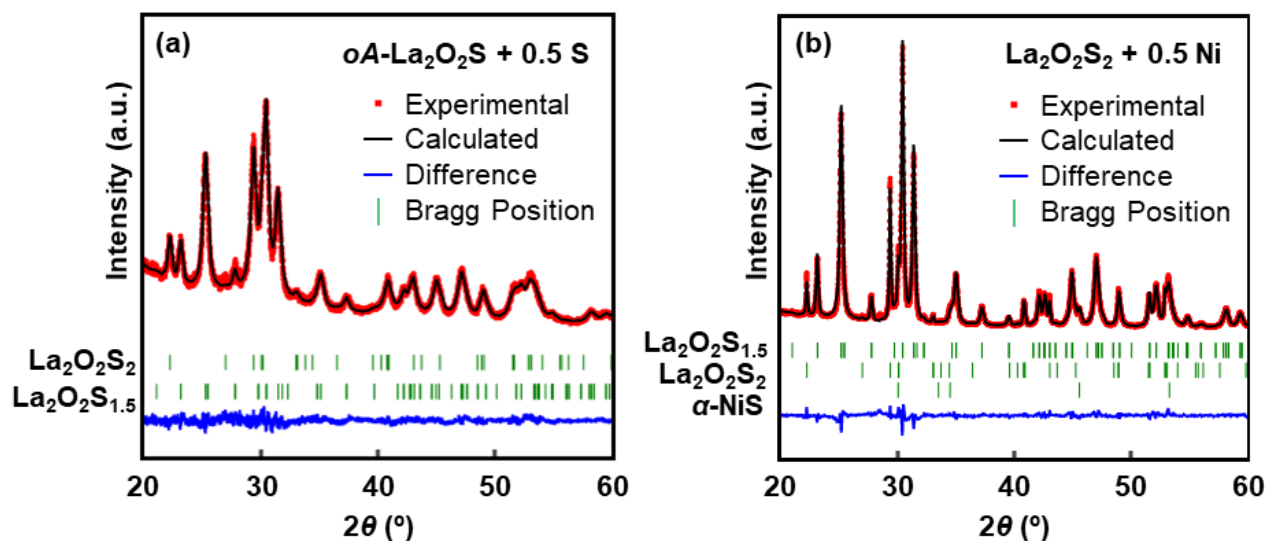

**Figure S17.** Rietveld refinements of the XRD patterns obtained from (a) the reaction mixture  $\alpha\text{-La}_2\text{O}_2\text{S} + 0.5 \text{ S}$  after the thermal treatment under  $200^\circ\text{C}$  for 4h and (b) the reaction mixture  $\text{La}_2\text{O}_2\text{S}_2 + 0.5 \text{ Ni}$  after the thermal treatment under  $350^\circ\text{C}$  for 4 h.

**Table S5.** Crystallographic parameters determined from Rietveld refinement of the mixture  $\alpha\text{-La}_2\text{O}_2\text{S} + 0.5 \text{ S}$  after the thermal treatments at  $200^\circ\text{C}$  for 4 h.

|                                                                                 |                                                                                                                                           |
|---------------------------------------------------------------------------------|-------------------------------------------------------------------------------------------------------------------------------------------|
| <b>Basic data</b>                                                               |                                                                                                                                           |
| Color                                                                           | Pale yellow                                                                                                                               |
| <b>Structural refinement – Profile</b>                                          |                                                                                                                                           |
| Profile reliability factor                                                      | $R_p = 3.60\%$                                                                                                                            |
| Weighted profile reliability factor                                             | $R_{wp} = 4.98\%$                                                                                                                         |
| <b>Crystallographic data – <math>\text{La}_2\text{O}_2\text{S}_{1.5}</math></b> |                                                                                                                                           |
| Chemical formula                                                                | $\text{La}_2\text{O}_2\text{S}_{1.5}$                                                                                                     |
| Molar mass ( $\text{g mol}^{-1}$ )                                              | 357.90                                                                                                                                    |
| Symmetry                                                                        | Orthorhombic                                                                                                                              |
| Space group                                                                     | $\text{Amm}2$ (No. 38)                                                                                                                    |
| $a$ (Å)                                                                         | 8.4329(4)                                                                                                                                 |
| $b$ (Å)                                                                         | 4.0272(5)                                                                                                                                 |
| $c$ (Å)                                                                         | 12.832(1)                                                                                                                                 |
| Volume (Å <sup>3</sup> )                                                        | 435.8(0)                                                                                                                                  |
| $Z$                                                                             | 4                                                                                                                                         |
| Density ( $\text{g cm}^{-3}$ )                                                  | 5.4549                                                                                                                                    |
| Anisotropic strain (Å <sup>-2</sup> ) <sup>2</sup>                              | $S_{400} = 4.05(9)$ ; $S_{040} = 38.8(9)$ ; $S_{004} = 0.405(5)$ ;<br>$S_{220} = 5.96(1)$ ; $S_{202} = 0.869(0)$ ; $S_{022} = 1.669(4)$ ; |
| Mass fraction                                                                   | 0.656                                                                                                                                     |

---

**Structural refinement – La<sub>2</sub>O<sub>2</sub>S<sub>1.5</sub>**

Bragg reliability factors

 $R(\text{obs}) = R(\text{all}) = 1.26\%$ 

Weighted Bragg profile reliability factors

 $R_w(\text{obs}) = R_w(\text{all}) = 1.43\%$ **Atomic positions and isotropic thermal parameters – La<sub>2</sub>O<sub>2</sub>S<sub>1.5</sub><sup>a</sup>**

| Atom | x          | y   | z          | $U_{\text{iso}}$ (Å <sup>2</sup> ) |
|------|------------|-----|------------|------------------------------------|
| La1  | 0.2648(3)  | 0.5 | 0.1161(7)  | 0.0099(3)                          |
| La2  | 0.5        | 0.5 | 0.4255(4)  | 0.0099(3)                          |
| La3  | 0          | 0.5 | 0.4324(8)  | 0.0099(3)                          |
| O1   | 0          | 0.5 | 0.0925(5)  | 0.0017(8)                          |
| O2   | 0.5        | 0.5 | 0.0275(25) | 0.0017(8)                          |
| O3   | -0.2674(0) | 0.5 | 0.4941(1)  | 0.0017(8)                          |
| S1   | 0.0925(75) | 0   | 0.2623(4)  | 0.0114(9)                          |
| S2   | 0.5        | 0   | 0.2272(9)  | 0.0114(9)                          |

**Crystallographic data – La<sub>2</sub>O<sub>2</sub>S<sub>2</sub><sup>b</sup>**

Chemical formula

La<sub>2</sub>O<sub>2</sub>S<sub>2</sub>Molar mass (g mol<sup>-1</sup>)

373.93

Symmetry

Orthorhombic

Space group

Cmca (No. 64)

a (Å)

13.217(0)

b (Å)

5.9210(8)

c (Å)

5.9483(7)

Volume (Å<sup>3</sup>)

465.5(1)

Z

4

Density (g cm<sup>-3</sup>)

5.3354

Anisotropic strain (Å<sup>-2</sup>)<sup>2</sup> $S_{400} = 0.595(8)$ ;  $S_{040} = 1.05(0)$ ;  $S_{004} = -1.07(6)$ ;  
 $S_{220} = 1.72(0)$ ;  $S_{202} = 0.986(5)$ ;  $S_{022} = 3.054(0)$ ;

Mass fraction

0.344

**Structural refinement – La<sub>2</sub>O<sub>2</sub>S<sub>2</sub>**

Bragg reliability factors

 $R(\text{obs}) = R(\text{all}) = 1.63\%$ 

Weighted Bragg profile reliability factors

 $R_w(\text{obs}) = R_w(\text{all}) = 1.69\%$ 

---

<sup>a</sup> Site-occupancy factors of all atoms were fixed to full occupancy. Isotropic thermal parameters were fixed to the same values as obtained by the PEDT analysis (See Table S4).<sup>b</sup> The La<sub>2</sub>O<sub>2</sub>S<sub>2</sub> phase was refined using the crystallographic data reported by Ostoréro et al.<sup>11</sup> Its atomic parameters were not refined and fixed to the same values with the reported ones.

**Table S6.** Crystallographic parameters determined from Rietveld refinement of the mixture  $\text{La}_2\text{O}_2\text{S}_2 + 0.5 \text{ Ni}$  after the thermal treatments at 350 °C for 4 h.

|                                                                                                                         |                                                                                                                                                 |     |           |                                    |
|-------------------------------------------------------------------------------------------------------------------------|-------------------------------------------------------------------------------------------------------------------------------------------------|-----|-----------|------------------------------------|
| <b>Basic data</b>                                                                                                       |                                                                                                                                                 |     |           |                                    |
| Color                                                                                                                   | Black                                                                                                                                           |     |           |                                    |
| <b>Structural refinement – Profile</b>                                                                                  |                                                                                                                                                 |     |           |                                    |
| Profile reliability factor                                                                                              | $R_p = 4.45\%$                                                                                                                                  |     |           |                                    |
| Weighted profile reliability factor                                                                                     | $R_{wp} = 6.17\%$                                                                                                                               |     |           |                                    |
| <b>Crystallographic data – <math>\text{La}_2\text{O}_2\text{S}_{1.5}</math></b>                                         |                                                                                                                                                 |     |           |                                    |
| Chemical formula                                                                                                        | $\text{La}_2\text{O}_2\text{S}_{1.5}$                                                                                                           |     |           |                                    |
| Molar mass ( $\text{g mol}^{-1}$ )                                                                                      | 357.90                                                                                                                                          |     |           |                                    |
| Symmetry                                                                                                                | Orthorhombic                                                                                                                                    |     |           |                                    |
| Space group                                                                                                             | $Amm2$ (No. 38)                                                                                                                                 |     |           |                                    |
| $a$ (Å)                                                                                                                 | 8.4759(5)                                                                                                                                       |     |           |                                    |
| $b$ (Å)                                                                                                                 | 4.0307(1)                                                                                                                                       |     |           |                                    |
| $c$ (Å)                                                                                                                 | 12.853(0)                                                                                                                                       |     |           |                                    |
| Volume (Å <sup>3</sup> )                                                                                                | 439.1(1)                                                                                                                                        |     |           |                                    |
| Z                                                                                                                       | 4                                                                                                                                               |     |           |                                    |
| Density ( $\text{g cm}^{-3}$ )                                                                                          | 5.4137                                                                                                                                          |     |           |                                    |
| Anisotropic strain (Å <sup>-2</sup> ) <sup>2</sup>                                                                      | $S_{400} = 0.590(1)$ ; $S_{040} = 8.64(2)$ ;<br>$S_{004} = 0.0731(5)$ ; $S_{220} = 0.752(3)$ ;<br>$S_{202} = 0.265(7)$ ; $S_{022} = 0.342(1)$ ; |     |           |                                    |
| Mass fraction                                                                                                           | 0.772                                                                                                                                           |     |           |                                    |
| <b>Structural refinement – <math>\text{La}_2\text{O}_2\text{S}_{1.5}</math></b>                                         |                                                                                                                                                 |     |           |                                    |
| Bragg reliability factors                                                                                               | $R(\text{obs}) = R(\text{all}) = 1.90\%$                                                                                                        |     |           |                                    |
| Weighted Bragg profile reliability factors                                                                              | $R_w(\text{obs}) = R_w(\text{all}) = 2.58\%$                                                                                                    |     |           |                                    |
| <b>Atomic positions and isotropic thermal parameters – <math>\text{La}_2\text{O}_2\text{S}_{1.5}</math><sup>a</sup></b> |                                                                                                                                                 |     |           |                                    |
| Atom                                                                                                                    | x                                                                                                                                               | y   | z         | $U_{\text{iso}}$ (Å <sup>2</sup> ) |
| La1                                                                                                                     | 0.2640(5)                                                                                                                                       | 0.5 | 0.1145(9) | 0.0099(3)                          |
| La2                                                                                                                     | 0.5                                                                                                                                             | 0.5 | 0.4214(1) | 0.0099(3)                          |
| La3                                                                                                                     | 0                                                                                                                                               | 0.5 | 0.4377(3) | 0.0099(3)                          |
| O1                                                                                                                      | 0                                                                                                                                               | 0.5 | 0.0201(4) | 0.0017(8)                          |
| O2                                                                                                                      | 0.5                                                                                                                                             | 0.5 | 0.0133(5) | 0.0017(8)                          |
| O3                                                                                                                      | -0.2731(7)                                                                                                                                      | 0.5 | 0.5000(8) | 0.0017(8)                          |
| S1                                                                                                                      | 0.1356(5)                                                                                                                                       | 0   | 0.2625(5) | 0.0114(9)                          |
| S2                                                                                                                      | 0.5                                                                                                                                             | 0   | 0.2322(8) | 0.0114(9)                          |

**Crystallographic data – La<sub>2</sub>O<sub>2</sub>S<sub>2</sub><sup>b</sup>**

|                                   |                                               |
|-----------------------------------|-----------------------------------------------|
| Chemical formula                  | La <sub>2</sub> O <sub>2</sub> S <sub>2</sub> |
| Molar mass (g mol <sup>-1</sup> ) | 373.93                                        |
| Symmetry                          | Orthorhombic                                  |
| Space group                       | <i>Cmca</i> (No. 64)                          |
| <i>a</i> (Å)                      | 13.219(1)                                     |
| <i>b</i> (Å)                      | 5.9416(8)                                     |
| <i>c</i> (Å)                      | 5.9344(6)                                     |
| Volume (Å <sup>3</sup> )          | 466.1(1)                                      |
| <i>Z</i>                          | 4                                             |
| Density (g cm <sup>-3</sup> )     | 5.3285                                        |
| Mass fraction                     | 0.122                                         |

**Structural refinement – La<sub>2</sub>O<sub>2</sub>S<sub>2</sub>**

|                                            |                                              |
|--------------------------------------------|----------------------------------------------|
| Bragg reliability factors                  | $R(\text{obs}) = R(\text{all}) = 3.24\%$     |
| Weighted Bragg profile reliability factors | $R_w(\text{obs}) = R_w(\text{all}) = 4.38\%$ |

**Crystallographic data – α-NiS<sup>c</sup>**

|                                   |                                     |
|-----------------------------------|-------------------------------------|
| Chemical formula                  | NiS                                 |
| Molar mass (g mol <sup>-1</sup> ) | 90.75                               |
| Symmetry                          | Hexagonal                           |
| Space group                       | <i>P6<sub>3</sub>/mmc</i> (No. 194) |
| <i>a</i> (Å)                      | 3.4332(3)                           |
| <i>c</i> (Å)                      | 5.3467(3)                           |
| Volume (Å <sup>3</sup> )          | 54.57(9)                            |
| <i>Z</i>                          | 2                                   |
| Density (g cm <sup>-3</sup> )     | 5.5220                              |
| Mass fraction                     | 0.106                               |

**Structural refinement – α-NiS**

|                                            |                                              |
|--------------------------------------------|----------------------------------------------|
| Bragg reliability factors                  | $R(\text{obs}) = R(\text{all}) = 2.20\%$     |
| Weighted Bragg profile reliability factors | $R_w(\text{obs}) = R_w(\text{all}) = 2.77\%$ |

<sup>a</sup> Site-occupancy factors of all atoms were fixed to full occupancy. Isotropic thermal parameters were fixed to the same values as obtained by the PEDT analysis (See Table S4).

<sup>b</sup> The La<sub>2</sub>O<sub>2</sub>S<sub>2</sub> phase was refined using the crystallographic data reported by Ostoréro et al.<sup>11</sup> Its atomic parameters were not refined and fixed to the same values with the reported ones.

<sup>c</sup> The α-NiS phase was refined using the crystallographic data reported by Trahan et al.<sup>12</sup> Its atomic parameters were not refined and fixed to the same values with the reported ones.

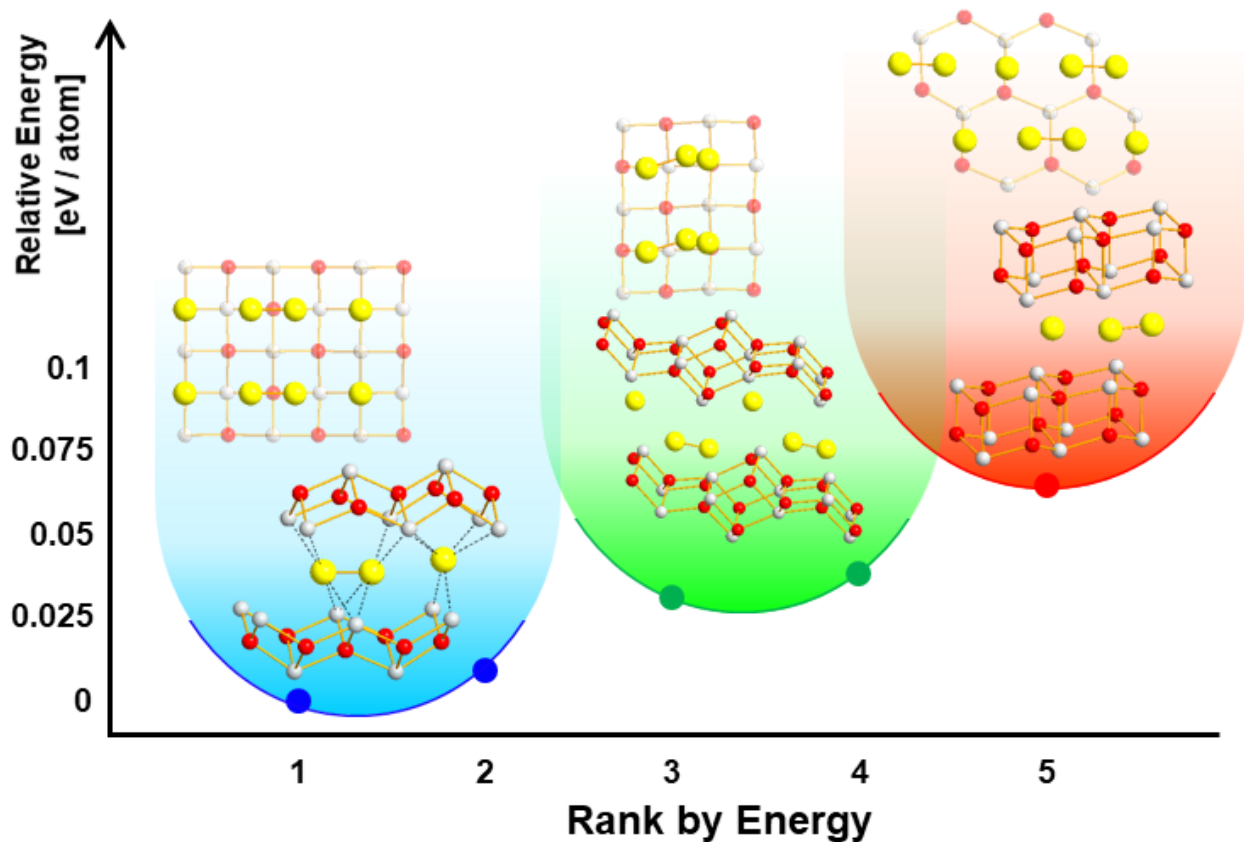

**Figure S18.** The most stable structures predicted for  $\text{La}_2\text{O}_2\text{S}_{1.5}$  composition by USPEX calculation. Those with the same structure type (and space groups) was grouped by each colour and the more stable one in each group was displayed. Each structure type was compared with respect to its enthalpy [eV/atom] relative to the most stable (1st in the rank) structure. Compared to the most stable structure type (1st in the rank), the second and third most stable structure types (3rd and 5<sup>th</sup> in the rank, respectively) are higher in energy by 31 and 65 meV/atom, respectively.

## References

1. Kortüm, G., Braun, W. & Herzog, G. Principles and techniques of diffuse - reflectance spectroscopy. *Angew. Chem. Int. Ed.* **2**, 333-304 (1963).
2. Tauc, J., Grigorovici, R. & Vancu, A. Optical properties and electronic structure of amorphous germanium. *Phys. Status Solidi* **15**, 627-637 (1966).
3. Davis, E. A. & Mott, N. F. Conduction in non-crystalline systems V. Conductivity, optical absorption and photoconductivity in amorphous semiconductors. *Phil. Mag. A* **22**, 903-922 (1970).



4. Sabatini, R., Gorni, T. & de Gironcoli, S. Nonlocal van der Waals density functional made simple and efficient. *Phys. Rev. B*, **87**, 041108 (2013).
5. Peng, H., Yang, Z.-H., Perdew, J. P. & Sun, J. Versatile van der Waals Density Functional Based on a Meta-Generalized Gradient Approximation. *Phys. Rev. X*, **6**, 041005 (2016).
6. Sun, J., Ruzsinszky, A. & Perdew, J. P. Strongly Constrained and Appropriately Normed Semilocal Density Functional. *Phys. Rev. Lett.* **115**, 036402 (2015).
7. Togo, A., Oba, F. & Tanaka, I. First-principles calculations of the ferroelastic transition between rutile-type and  $\text{CaCl}_2$ -type  $\text{SiO}_2$  at high pressures. *Phys. Rev. B* **78**, 134106-134114 (2008).
8. Tasci, E. S., de la Flor, G., Orobengoa, D., Capillas, C., Perez-Mato, J. M. & Aroyo, M. I. An introduction to the tools hosted in the Bilbao Crystallographic Server, *EPJ Web of Conferences* **22**, 00009 (2012).
9. Yokono, S., Imanaga, S. & Hoshina, T. Raman Spectra for Eu Doped  $\text{Ln}_2\text{O}_2\text{S}$  Phosphors. *J. Phys. Soc. Jpn.* **46**, 1882-1888 (1979).
10. Morosin, B. & Newman, D. J.  $\text{La}_2\text{O}_2\text{S}$  structure refinement and crystal field. *Acta Cryst.* **B29**, 2647-2648 (1973).
11. Ostoréro, J. & Leblanc, M. Room-temperature structure of  $\text{La}_2\text{O}_2\text{S}_2$ . *Acta Cryst.* **C46**, 1376-1378 (1990).
12. Trahan, J., Goodrich, R. G. & Watkins, S. F. X-ray diffraction measurements on metallic and semiconducting hexagonal NiS. *Phys. Rev. B* **2**, 2859-2863 (1970).
